# Supplementary material for: Heterologous expression of the Stellaria media plant defensin SmD1 in Escherichia coli
Source: PeerJ. 2025 Jun 24;13:e19526. doi: 10.7717/peerj.19526 (PMC12204088; doi:10.7717/peerj.19526)
Supplement: Supplemental Information 1 [file peerj-13-19526-s001.xlsx]

## Sheet: Sheet1
Figure 5
OD600	The diameter of inhibition zone (cm)			Average (cm)	Standard Deviation
X	Y1	Y2	Y3
0.4	1.354	1.364	1.356	1.358	±0.005
0.6	1.482	1.49	1.46	1.47733	±0.016
0.8	1.55	1.542	1.522	1.538	±0.014
1	1.458	1.434	1.42	1.43733	±0.019
1.2	1.33	1.304	1.318	1.31733	±0.013
Figure 6
Induction time (h)	The diameter of inhibition zone (cm)			Average (cm)	Standard Deviation
X	Y1	Y2	Y3
8	1.47	1.5	1.494	1.488	±0.016
12	1.566	1.592	1.582	1.58	±0.013
16	1.528	1.554	1.552	1.54467	±0.014
20	1.438	1.476	1.458	1.45733	±0.019
24	1.364	1.406	1.382	1.384	±0.021
Figure 7
Temperature (℃)	The diameter of inhibition zone (cm)			Average (cm)	Standard Deviation
X	Y1	Y2	Y3
16	1.364	1.398	1.388	1.38333	±0.017
25	1.446	1.474	1.448	1.456	±0.016
30	1.396	1.432	1.412	1.41333	±0.018
37	1.006	1.09	1.018	1.038	±0.045
Figure 8
IPTG concentraction	The diameter of inhibition zone (cm)			Average (cm)	Standard Deviation
X	Y1	Y2	Y3
0.2	1.162	1.138	1.166	1.15533	±0.015
0.4	1.222	1.246	1.25	1.23933	±0.015
0.6	1.42	1.41	1.386	1.40533	±0.017
0.8	1.372	1.392	1.37	1.378	±0.012
1	1.34	1.368	1.336	1.348	±0.017
1.2	1.19	1.214	1.17	1.19133	±0.022
Table 1
The indicator strains	The diameter of inhibition zone (cm)			Average1 (cm) 3 decimal places	Average 2(cm) 2 decimal places	Standard Deviation
	Y1	Y2	Y3
B. cinereal CGMCC 3.4584	1.576	1.594	1.606	1.592	1.59	±0.015
F. graminearu CGMCC 3.6862	1.538	1.534	1.482	1.518	1.52	±0.031
F. oxysporum CGMCC 3.2830	1.508	1.462	1.476	1.482	1.48	±0.024
R. solani CGMCC 3.2888	1.398	1.438	1.446	1.42733	1.43	±0.026
